# Supplementary material for: The Impact of the Different Stages of COVID-19, Time of the Week and Exercise Frequency on Mental Distress in Men and Women
Source: MDPI journal article supplement (doi:10.3390/nu14132572), 2022-06-21
Supplement: s1 [file s1]

| COVID-19 Era             |                 | Exercise Frequency          | Margin       | Standard Error | z             | P> z         | [95% confidence Interval] |              |
|--------------------------|-----------------|-----------------------------|--------------|----------------|---------------|--------------|---------------------------|--------------|
| Moderate Mental Distress | Before COVID-19 | $x < 2$ times a week        | 0.247        | 0.027          | 9.230         | 0.000        | 0.195                     | 0.299        |
|                          |                 | $2 \leq x < 4$ times a week | <b>0.212</b> | <b>0.029</b>   | <b>7.190</b>  | <b>0.000</b> | <b>0.154</b>              | <b>0.270</b> |
|                          |                 | $x \geq 4$ times a week     | 0.241        | 0.030          | 7.960         | 0.000        | 0.182                     | 0.301        |
|                          | During COVID-19 | $x < 2$ times a week        | 0.262        | 0.019          | 14.180        | 0.000        | 0.226                     | 0.299        |
|                          |                 | $2 \leq x < 4$ times a week | 0.252        | 0.018          | 14.070        | 0.000        | 0.217                     | 0.287        |
|                          |                 | $x \geq 4$ times a week     | <b>0.219</b> | <b>0.019</b>   | <b>11.310</b> | <b>0.000</b> | <b>0.181</b>              | <b>0.257</b> |
|                          | Late COVID-19   | $x < 2$ times a week        | 0.244        | 0.026          | 9.260         | 0.000        | 0.192                     | 0.295        |
|                          |                 | $2 \leq x < 4$ times a week | 0.236        | 0.027          | 8.880         | 0.000        | 0.184                     | 0.288        |
|                          |                 | $x \geq 4$ times a week     | <b>0.219</b> | <b>0.027</b>   | <b>8.100</b>  | <b>0.000</b> | <b>0.166</b>              | <b>0.272</b> |
| Severe Mental Distress   | Before COVID-19 | $x < 2$ times a week        | 0.231        | 0.058          | 3.980         | 0.000        | 0.117                     | 0.344        |
|                          |                 | $2 \leq x < 4$ times a week | <b>0.164</b> | <b>0.041</b>   | <b>4.010</b>  | <b>0.000</b> | <b>0.084</b>              | <b>0.244</b> |
|                          |                 | $x \geq 4$ times a week     | 0.217        | 0.062          | 3.520         | 0.000        | 0.096                     | 0.337        |
|                          | During COVID-19 | $x < 2$ times a week        | 0.282        | 0.034          | 8.370         | 0.000        | 0.216                     | 0.348        |
|                          |                 | $2 \leq x < 4$ times a week | 0.245        | 0.025          | 9.700         | 0.000        | 0.196                     | 0.295        |
|                          |                 | $x \geq 4$ times a week     | <b>0.175</b> | <b>0.024</b>   | <b>7.220</b>  | <b>0.000</b> | <b>0.127</b>              | <b>0.222</b> |
|                          | Late COVID-19   | $x < 2$ times a week        | 0.222        | 0.053          | 4.210         | 0.000        | 0.119                     | 0.326        |
|                          |                 | $2 \leq x < 4$ times a week | 0.205        | 0.047          | 4.330         | 0.000        | 0.112                     | 0.298        |
|                          |                 | $x \geq 4$ times a week     | <b>0.175</b> | <b>0.040</b>   | <b>4.410</b>  | <b>0.000</b> | <b>0.097</b>              | <b>0.252</b> |

Table S1: Predicted margins (probability), P-value, and 95% confidence interval of moderate and severe mental distress levels by exercise frequency and COVID-19 era in men. **Moderate exercise frequency before COVID-19, and high exercise frequency during and late COVID-19 are associated with the lowest probability to be in the moderate and severe mental distress levels. Low exercise frequency before, during, and late COVID-19 are associated with the highest probability to be in the moderate and severe mental distress levels.**

| COVID-19 Era                    |                 | Exercise Frequency          | Margin       | Standard Error | Z             | P> z         | [95% confidence Interval] |              |
|---------------------------------|-----------------|-----------------------------|--------------|----------------|---------------|--------------|---------------------------|--------------|
| Moderate Mental Health Disorder | Before COVID-19 | $x < 2$ times a week        | 0.323        | 0.016          | 20.720        | 0.000        | 0.293                     | 0.354        |
|                                 |                 | $2 \leq x < 4$ times a week | <b>0.313</b> | <b>0.015</b>   | <b>20.270</b> | <b>0.000</b> | <b>0.283</b>              | <b>0.344</b> |
|                                 |                 | $x \geq 4$ times a week     | 0.332        | 0.020          | 16.580        | 0.000        | 0.293                     | 0.371        |
|                                 | During COVID-19 | $x < 2$ times a week        | 0.353        | 0.013          | 28.070        | 0.000        | 0.329                     | 0.378        |
|                                 |                 | $2 \leq x < 4$ times a week | 0.356        | 0.013          | 28.250        | 0.000        | 0.331                     | 0.381        |
|                                 |                 | $x \geq 4$ times a week     | <b>0.321</b> | <b>0.023</b>   | <b>14.160</b> | <b>0.000</b> | <b>0.276</b>              | <b>0.365</b> |
|                                 | Late COVID-19   | $x < 2$ times a week        | 0.349        | 0.015          | 23.400        | 0.000        | 0.320                     | 0.379        |
|                                 |                 | $2 \leq x < 4$ times a week | 0.329        | 0.019          | 17.490        | 0.000        | 0.292                     | 0.366        |
|                                 |                 | $x \geq 4$ times a week     | <b>0.300</b> | <b>0.041</b>   | <b>7.300</b>  | <b>0.000</b> | <b>0.219</b>              | <b>0.380</b> |
| Severe Mental Health Disorder   | Before COVID-19 | $x < 2$ times a week        | 0.191        | 0.020          | 9.660         | 0.000        | 0.153                     | 0.230        |
|                                 |                 | $2 \leq x < 4$ times a week | <b>0.176</b> | <b>0.019</b>   | <b>9.140</b>  | <b>0.000</b> | <b>0.138</b>              | <b>0.213</b> |
|                                 |                 | $x \geq 4$ times a week     | 0.207        | 0.036          | 5.720         | 0.000        | 0.136                     | 0.278        |
|                                 | During COVID-19 | $x < 2$ times a week        | 0.377        | 0.021          | 17.900        | 0.000        | 0.335                     | 0.418        |
|                                 |                 | $2 \leq x < 4$ times a week | <b>0.294</b> | <b>0.021</b>   | <b>14.080</b> | <b>0.000</b> | <b>0.253</b>              | <b>0.334</b> |
|                                 |                 | $x \geq 4$ times a week     | 0.497        | 0.052          | 9.520         | 0.000        | 0.395                     | 0.600        |
|                                 | Late COVID-19   | $x < 2$ times a week        | 0.256        | 0.032          | 7.920         | 0.000        | 0.193                     | 0.320        |
|                                 |                 | $2 \leq x < 4$ times a week | 0.201        | 0.030          | 6.720         | 0.000        | 0.143                     | 0.260        |
|                                 |                 | $x \geq 4$ times a week     | <b>0.157</b> | <b>0.049</b>   | <b>3.180</b>  | <b>0.001</b> | <b>0.060</b>              | <b>0.254</b> |

Table S2: Predicted margins (probability), P-value, and 95% confidence interval of moderate and severe mental distress levels by exercise frequency and COVID-19 era in Women. **Moderate exercise frequency before COVID-19, and high exercise frequency during and late COVID-19 are associated with the lowest probability to be in the moderate mental distress level, and moderate exercise frequency before, and during COVID-19, and high exercise frequency late COVID-19 are associated with the lowest probability to be in the severe mental distress level. High exercise frequency before COVID-19, and moderate exercise frequency during and late COVID-19 are associated with the highest probability to be in the moderate mental distress level, and High exercise frequency before and during COVID-19, and low exercise frequency in late COVID-19 era are associated with the highest probability to be in the severe mental distress levels.**

| COVID-19 Era                    |                 | Exercise Frequency                               | Margin       | Standard Error | z             | P> z         | [95% confidence Interval] |              |
|---------------------------------|-----------------|--------------------------------------------------|--------------|----------------|---------------|--------------|---------------------------|--------------|
| Moderate Mental Health Disorder | Before COVID-19 | $x < 2$ times a week                             | 0.304        | 0.015          | 20.090        | 0.000        | 0.274                     | 0.334        |
|                                 |                 | <b><math>2 \leq x &lt; 4</math> times a week</b> | <b>0.271</b> | <b>0.017</b>   | <b>16.070</b> | <b>0.000</b> | <b>0.238</b>              | <b>0.304</b> |
|                                 |                 | $x \geq 4$ times a week                          | 0.308        | 0.020          | 15.740        | 0.000        | 0.269                     | 0.346        |
|                                 | During COVID-19 | $x < 2$ times a week                             | 0.334        | 0.011          | 29.380        | 0.000        | 0.311                     | 0.356        |
|                                 |                 | $2 \leq x < 4$ times a week                      | 0.329        | 0.011          | 28.740        | 0.000        | 0.307                     | 0.352        |
|                                 |                 | <b><math>x \geq 4</math> times a week</b>        | <b>0.322</b> | <b>0.013</b>   | <b>24.690</b> | <b>0.000</b> | <b>0.297</b>              | <b>0.348</b> |
|                                 | Late COVID-19   | $x < 2$ times a week                             | 0.328        | 0.013          | 25.510        | 0.000        | 0.303                     | 0.353        |
|                                 |                 | $2 \leq x < 4$ times a week                      | 0.304        | 0.016          | 18.550        | 0.000        | 0.272                     | 0.336        |
|                                 |                 | <b><math>x \geq 4</math> times a week</b>        | <b>0.276</b> | <b>0.025</b>   | <b>11.240</b> | <b>0.000</b> | <b>0.228</b>              | <b>0.324</b> |
| Severe Mental Health Disorder   | Before COVID-19 | $x < 2$ times a week                             | 0.205        | 0.023          | 8.940         | 0.000        | 0.160                     | 0.250        |
|                                 |                 | <b><math>2 \leq x &lt; 4</math> times a week</b> | <b>0.155</b> | <b>0.019</b>   | <b>8.200</b>  | <b>0.000</b> | <b>0.118</b>              | <b>0.192</b> |
|                                 |                 | $x \geq 4$ times a week                          | 0.213        | 0.037          | 5.760         | 0.000        | 0.140                     | 0.285        |
|                                 | During COVID-19 | $x < 2$ times a week                             | 0.348        | 0.021          | 16.960        | 0.000        | 0.308                     | 0.389        |
|                                 |                 | $2 \leq x < 4$ times a week                      | 0.281        | 0.018          | 15.640        | 0.000        | 0.246                     | 0.317        |
|                                 |                 | <b><math>x \geq 4</math> times a week</b>        | <b>0.251</b> | <b>0.026</b>   | <b>9.620</b>  | <b>0.000</b> | <b>0.200</b>              | <b>0.302</b> |
|                                 | Late COVID-19   | $x < 2$ times a week                             | 0.273        | 0.031          | 8.770         | 0.000        | 0.212                     | 0.335        |
|                                 |                 | $2 \leq x < 4$ times a week                      | 0.205        | 0.026          | 7.790         | 0.000        | 0.154                     | 0.257        |
|                                 |                 | <b><math>x \geq 4</math> times a week</b>        | <b>0.162</b> | <b>0.030</b>   | <b>5.330</b>  | <b>0.000</b> | <b>0.102</b>              | <b>0.222</b> |

Table S3: Predicted margins (probability), P-value, and 95% confidence interval of moderate and severe mental distress levels by exercise frequency and COVID-19 era during weekdays. **Moderate exercise frequency before COVID-19, and high exercise frequency during and late COVID-19 are associated with the lowest probability to be in the moderate and severe mental distress levels. High exercise frequency before COVID-19, and low exercise frequency during and late COVID-19 are associated with the highest probability to be in the moderate and severe mental distress levels.**

| COVID-19 Era                    |                 | Exercise Frequency          | Margin       | Standard Error | z             | P> z         | [95% confidence Interval] |              |
|---------------------------------|-----------------|-----------------------------|--------------|----------------|---------------|--------------|---------------------------|--------------|
| Moderate Mental Health Disorder | Before COVID-19 | $x < 2$ times a week        | 0.267        | 0.027          | 10.060        | 0.000        | 0.215                     | 0.319        |
|                                 |                 | $2 \leq x < 4$ times a week | 0.287        | 0.023          | 12.230        | 0.000        | 0.241                     | 0.333        |
|                                 |                 | $x \geq 4$ times a week     | <b>0.262</b> | <b>0.035</b>   | <b>7.430</b>  | <b>0.000</b> | <b>0.193</b>              | <b>0.331</b> |
|                                 | During COVID-19 | $x < 2$ times a week        | 0.297        | 0.023          | 12.880        | 0.000        | 0.252                     | 0.342        |
|                                 |                 | $2 \leq x < 4$ times a week | <b>0.278</b> | <b>0.024</b>   | <b>11.610</b> | <b>0.000</b> | <b>0.231</b>              | <b>0.325</b> |
|                                 |                 | $x \geq 4$ times a week     | <b>0.278</b> | <b>0.031</b>   | <b>9.010</b>  | <b>0.000</b> | <b>0.217</b>              | <b>0.338</b> |
|                                 | Late COVID-19   | $x < 2$ times a week        | 0.246        | 0.048          | 5.090         | 0.000        | 0.151                     | 0.340        |
|                                 |                 | $2 \leq x < 4$ times a week | 0.210        | 0.074          | 2.840         | 0.005        | 0.065                     | 0.355        |
|                                 |                 | $x \geq 4$ times a week     | <b>0.049</b> | <b>0.094</b>   | <b>0.530</b>  | <b>0.599</b> | <b>-0.135</b>             | <b>0.233</b> |
| Severe Mental Health Disorder   | Before COVID-19 | $x < 2$ times a week        | 0.200        | 0.035          | 5.680         | 0.000        | 0.131                     | 0.269        |
|                                 |                 | $2 \leq x < 4$ times a week | 0.251        | 0.039          | 6.360         | 0.000        | 0.173                     | 0.328        |
|                                 |                 | $x \geq 4$ times a week     | <b>0.190</b> | <b>0.057</b>   | <b>3.310</b>  | <b>0.001</b> | <b>0.077</b>              | <b>0.302</b> |
|                                 | During COVID-19 | $x < 2$ times a week        | 0.413        | 0.040          | 10.370        | 0.000        | 0.335                     | 0.492        |
|                                 |                 | $2 \leq x < 4$ times a week | 0.225        | 0.036          | 6.180         | 0.000        | 0.153                     | 0.296        |
|                                 |                 | $x \geq 4$ times a week     | <b>0.224</b> | <b>0.061</b>   | <b>3.680</b>  | <b>0.000</b> | <b>0.105</b>              | <b>0.343</b> |
|                                 | Late COVID-19   | $x < 2$ times a week        | 0.164        | 0.064          | 2.550         | 0.011        | 0.038                     | 0.289        |
|                                 |                 | $2 \leq x < 4$ times a week | 0.120        | 0.075          | 1.600         | 0.111        | -0.027                    | 0.267        |
|                                 |                 | $x \geq 4$ times a week     | <b>0.017</b> | <b>0.037</b>   | <b>0.460</b>  | <b>0.645</b> | <b>-0.056</b>             | <b>0.090</b> |

Table S4: Predicted margins (probability), P-value, and 95% confidence interval of moderate and severe mental distress levels by exercise frequency and COVID-19 era during weekends. **High exercise frequency before, during and late COVID-19 are associated with the lowest probability to be in the moderate and severe mental distress levels. Moderate exercise frequency before COVID-19, and low exercise frequency during and late COVID-19 are associated with the highest probability to be in the moderate and severe mental distress levels.**

| COVID-19 Era                    |                 | Exercise Frequency          | Margin       | Standard Error | z            | P> z         | [95% confidence Interval] |              |
|---------------------------------|-----------------|-----------------------------|--------------|----------------|--------------|--------------|---------------------------|--------------|
| Moderate Mental Health Disorder | Before COVID-19 | $x < 2$ times a week        | <b>0.138</b> | <b>0.066</b>   | <b>2.080</b> | <b>0.038</b> | <b>0.008</b>              | <b>0.267</b> |
|                                 |                 | $2 \leq x < 4$ times a week | 0.277        | 0.053          | 5.210        | 0.000        | 0.172                     | 0.381        |
|                                 |                 | $x \geq 4$ times a week     | 0.284        | 0.056          | 5.080        | 0.000        | 0.174                     | 0.394        |
|                                 | During COVID-19 | $x < 2$ times a week        | 0.291        | 0.047          | 6.130        | 0.000        | 0.198                     | 0.383        |
|                                 |                 | $2 \leq x < 4$ times a week | 0.257        | 0.049          | 5.280        | 0.000        | 0.162                     | 0.352        |
|                                 |                 | $x \geq 4$ times a week     | <b>0.247</b> | <b>0.051</b>   | <b>4.860</b> | <b>0.000</b> | <b>0.147</b>              | <b>0.347</b> |
|                                 | Late COVID-19   | $x < 2$ times a week        | 0.178        | 0.113          | 1.570        | 0.117        | -0.045                    | 0.400        |
|                                 |                 | $2 \leq x < 4$ times a week | 0.245        | 0.114          | 2.160        | 0.031        | 0.023                     | 0.468        |
|                                 |                 | $x \geq 4$ times a week     | <b>0.041</b> | <b>0.072</b>   | <b>0.560</b> | <b>0.572</b> | <b>-0.101</b>             | <b>0.182</b> |
| Severe Mental Health Disorder   | Before COVID-19 | $x < 2$ times a week        | <b>0.077</b> | <b>0.043</b>   | <b>1.790</b> | <b>0.073</b> | <b>-0.007</b>             | <b>0.161</b> |
|                                 |                 | $2 \leq x < 4$ times a week | 0.246        | 0.103          | 2.380        | 0.017        | 0.044                     | 0.449        |
|                                 |                 | $x \geq 4$ times a week     | 0.432        | 0.171          | 2.530        | 0.011        | 0.097                     | 0.766        |
|                                 | During COVID-19 | $x < 2$ times a week        | 0.371        | 0.073          | 5.070        | 0.000        | 0.227                     | 0.514        |
|                                 |                 | $2 \leq x < 4$ times a week | 0.199        | 0.061          | 3.260        | 0.001        | 0.079                     | 0.319        |
|                                 |                 | $x \geq 4$ times a week     | <b>0.182</b> | <b>0.061</b>   | <b>2.970</b> | <b>0.003</b> | <b>0.062</b>              | <b>0.302</b> |
|                                 | Late COVID-19   | $x < 2$ times a week        | 0.106        | 0.084          | 1.250        | 0.210        | -0.060                    | 0.271        |
|                                 |                 | $2 \leq x < 4$ times a week | 0.179        | 0.170          | 1.050        | 0.293        | -0.155                    | 0.513        |
|                                 |                 | $x \geq 4$ times a week     | <b>0.018</b> | <b>0.044</b>   | <b>0.400</b> | <b>0.686</b> | <b>-0.069</b>             | <b>0.105</b> |

Table S5: Predicted margins (probability), P-value, and 95% confidence interval of moderate and severe mental distress levels by exercise frequency and COVID-19 era on men during weekends. **Low exercise frequency before COVID-19, and high exercise frequency during and late COVID-19 are associated with the lowest probability to be in the moderate and severe mental distress levels. High exercise frequency before COVID-19, low exercise frequency during COVID-19, and moderate exercise frequency late COVID-19 are associated with the highest probability to be in the moderate and severe mental distress levels.**

| COVID-19 Era                    |                 | Exercise Frequency          | Margin       | Standard Error | z             | P> z         | [95% confidence Interval] |              |
|---------------------------------|-----------------|-----------------------------|--------------|----------------|---------------|--------------|---------------------------|--------------|
| Moderate Mental Health Disorder | Before COVID-19 | $x < 2$ times a week        | 0.268        | 0.021          | 12.950        | 0.000        | 0.228                     | 0.309        |
|                                 |                 | $2 \leq x < 4$ times a week | <b>0.192</b> | <b>0.035</b>   | <b>5.480</b>  | <b>0.000</b> | <b>0.124</b>              | <b>0.261</b> |
|                                 |                 | $x \geq 4$ times a week     | 0.225        | 0.037          | 6.030         | 0.000        | 0.152                     | 0.299        |
|                                 | During COVID-19 | $x < 2$ times a week        | 0.249        | 0.021          | 11.760        | 0.000        | 0.208                     | 0.291        |
|                                 |                 | $2 \leq x < 4$ times a week | 0.255        | 0.019          | 13.160        | 0.000        | 0.217                     | 0.293        |
|                                 |                 | $x \geq 4$ times a week     | <b>0.223</b> | <b>0.021</b>   | <b>10.490</b> | <b>0.000</b> | <b>0.181</b>              | <b>0.265</b> |
|                                 | Late COVID-19   | $x < 2$ times a week        | 0.240        | 0.029          | 8.390         | 0.000        | 0.184                     | 0.296        |
|                                 |                 | $2 \leq x < 4$ times a week | 0.239        | 0.027          | 8.720         | 0.000        | 0.185                     | 0.293        |
|                                 |                 | $x \geq 4$ times a week     | <b>0.219</b> | <b>0.028</b>   | <b>7.890</b>  | <b>0.000</b> | <b>0.164</b>              | <b>0.273</b> |
| Severe Mental Health Disorder   | Before COVID-19 | $x < 2$ times a week        | 0.324        | 0.083          | 3.910         | 0.000        | 0.161                     | 0.486        |
|                                 |                 | $2 \leq x < 4$ times a week | <b>0.137</b> | <b>0.042</b>   | <b>3.290</b>  | <b>0.001</b> | <b>0.055</b>              | <b>0.219</b> |
|                                 |                 | $x \geq 4$ times a week     | 0.185        | 0.062          | 2.980         | 0.003        | 0.063                     | 0.307        |
|                                 | During COVID-19 | $x < 2$ times a week        | 0.238        | 0.035          | 6.820         | 0.000        | 0.170                     | 0.306        |
|                                 |                 | $2 \leq x < 4$ times a week | 0.254        | 0.027          | 9.300         | 0.000        | 0.201                     | 0.308        |
|                                 |                 | $x \geq 4$ times a week     | <b>0.181</b> | <b>0.028</b>   | <b>6.550</b>  | <b>0.000</b> | <b>0.127</b>              | <b>0.236</b> |
|                                 | Late COVID-19   | $x < 2$ times a week        | 0.214        | 0.054          | 3.930         | 0.000        | 0.107                     | 0.320        |
|                                 |                 | $2 \leq x < 4$ times a week | 0.212        | 0.051          | 4.190         | 0.000        | 0.113                     | 0.311        |
|                                 |                 | $x \geq 4$ times a week     | <b>0.174</b> | <b>0.040</b>   | <b>4.350</b>  | <b>0.000</b> | <b>0.096</b>              | <b>0.253</b> |

Table S6: Predicted margins (probability), P-value, and 95% confidence interval of moderate and severe mental distress levels by exercise frequency and COVID-19 era on men during weekdays. **Moderate exercise frequency before COVID-19, and high exercise frequency during and late COVID-19 are associated with the lowest probability to be in the moderate and severe mental distress levels. Low exercise frequency before and late COVID-19, and moderate exercise frequency during COVID-19 are associated with the highest probability to be in the moderate and severe mental distress levels.**

| Covid-19 Era                    |              | Exercise Frequency          | Margin       | Standard Error | z             | P> z         | [95% confidence Interval] |              |
|---------------------------------|--------------|-----------------------------|--------------|----------------|---------------|--------------|---------------------------|--------------|
| Moderate Mental Health Disorder | Before Covid | $x < 2$ times a week        | 0.328        | 0.019          | 17.270        | 0.000        | 0.291                     | 0.366        |
|                                 |              | $2 \leq x < 4$ times a week | <b>0.312</b> | <b>0.020</b>   | <b>15.920</b> | <b>0.000</b> | <b>0.274</b>              | <b>0.351</b> |
|                                 |              | $x \geq 4$ times a week     | 0.351        | 0.023          | 15.530        | 0.000        | 0.307                     | 0.396        |
|                                 | During Covid | $x < 2$ times a week        | 0.366        | 0.014          | 25.530        | 0.000        | 0.338                     | 0.394        |
|                                 |              | $2 \leq x < 4$ times a week | 0.372        | 0.014          | 26.010        | 0.000        | 0.344                     | 0.400        |
|                                 |              | $x \geq 4$ times a week     | <b>0.341</b> | <b>0.023</b>   | <b>14.670</b> | <b>0.000</b> | <b>0.295</b>              | <b>0.386</b> |
|                                 | Late Covid   | $x < 2$ times a week        | 0.370        | 0.015          | 24.470        | 0.000        | 0.340                     | 0.399        |
|                                 |              | $2 \leq x < 4$ times a week | 0.345        | 0.020          | 17.250        | 0.000        | 0.306                     | 0.385        |
|                                 |              | $x \geq 4$ times a week     | <b>0.311</b> | <b>0.044</b>   | <b>7.160</b>  | <b>0.000</b> | <b>0.226</b>              | <b>0.397</b> |
| Severe Mental Health Disorder   | Before Covid | $x < 2$ times a week        | 0.174        | 0.022          | 7.910         | 0.000        | 0.131                     | 0.217        |
|                                 |              | $2 \leq x < 4$ times a week | <b>0.153</b> | <b>0.021</b>   | <b>7.330</b>  | <b>0.000</b> | <b>0.112</b>              | <b>0.194</b> |
|                                 |              | $x \geq 4$ times a week     | 0.214        | 0.044          | 4.850         | 0.000        | 0.128                     | 0.301        |
|                                 | During Covid | $x < 2$ times a week        | 0.379        | 0.024          | 15.720        | 0.000        | 0.332                     | 0.426        |
|                                 |              | $2 \leq x < 4$ times a week | <b>0.303</b> | <b>0.024</b>   | <b>12.830</b> | <b>0.000</b> | <b>0.257</b>              | <b>0.350</b> |
|                                 |              | $x \geq 4$ times a week     | 0.471        | 0.054          | 8.790         | 0.000        | 0.366                     | 0.576        |
|                                 | Late Covid   | $x < 2$ times a week        | 0.282        | 0.037          | 7.720         | 0.000        | 0.210                     | 0.353        |
|                                 |              | $2 \leq x < 4$ times a week | 0.202        | 0.031          | 6.520         | 0.000        | 0.141                     | 0.262        |
|                                 |              | $x \geq 4$ times a week     | <b>0.152</b> | <b>0.049</b>   | <b>3.120</b>  | <b>0.002</b> | <b>0.056</b>              | <b>0.248</b> |

Table S7: Predicted margins (probability), P-value, and 95% confidence interval of moderate and severe mental distress levels by exercise frequency and Covid-19 era on women during weekdays. **Moderate exercise frequency before COVID-19, and high exercise frequency during and late COVID-19 are associated with the lowest probability to be in the moderate mental distress level, and moderate exercise frequency before and during COVID-19, and high exercise frequency late COVID-19 are associated with the lowest probability to be in the severe mental distress level. High exercise frequency before COVID-19, moderate exercise frequency during COVID-19, and low exercise frequency late COVID-19 are associated with the highest probability to be in the moderate mental distress level, and high exercise frequency before and during COVID-19, and low exercise frequency late COVID-19 are associated with the highest probability to be in the severe mental distress level.**

| Covid-19 Era                    |              | Exercise Frequency          | Margin       | Standard Error | z             | P> z         | [95% confidence Interval] |              |
|---------------------------------|--------------|-----------------------------|--------------|----------------|---------------|--------------|---------------------------|--------------|
| Moderate Mental Health Disorder | Before Covid | $x < 2$ times a week        | 0.282        | 0.031          | 9.230         | 0.000        | 0.222                     | 0.342        |
|                                 |              | $2 \leq x < 4$ times a week | 0.297        | 0.027          | 11.070        | 0.000        | 0.244                     | 0.349        |
|                                 |              | $x \geq 4$ times a week     | <b>0.270</b> | <b>0.039</b>   | <b>6.970</b>  | <b>0.000</b> | <b>0.194</b>              | <b>0.346</b> |
|                                 | During Covid | $x < 2$ times a week        | 0.311        | 0.027          | 11.550        | 0.000        | 0.258                     | 0.364        |
|                                 |              | $2 \leq x < 4$ times a week | <b>0.299</b> | <b>0.027</b>   | <b>11.020</b> | <b>0.000</b> | <b>0.246</b>              | <b>0.352</b> |
|                                 |              | $x \geq 4$ times a week     | 0.000        | 0.000          | 0.000         | 0.999        | -0.001                    | 0.001        |
|                                 | Late Covid   | $x < 2$ times a week        | 0.247        | 0.059          | 4.200         | 0.000        | 0.132                     | 0.362        |
|                                 |              | $2 \leq x < 4$ times a week | <b>0.214</b> | <b>0.104</b>   | <b>2.060</b>  | <b>0.040</b> | <b>0.010</b>              | <b>0.418</b> |
|                                 |              | $x \geq 4$ times a week     | 0.282        | 0.031          | 9.230         | 0.000        | 0.222                     | 0.342        |
| Severe Mental Health Disorder   | Before Covid | $x < 2$ times a week        | 0.213        | 0.038          | 5.560         | 0.000        | 0.138                     | 0.288        |
|                                 |              | $2 \leq x < 4$ times a week | 0.252        | 0.041          | 6.170         | 0.000        | 0.172                     | 0.332        |
|                                 |              | $x \geq 4$ times a week     | <b>0.189</b> | <b>0.061</b>   | <b>3.130</b>  | <b>0.002</b> | <b>0.071</b>              | <b>0.308</b> |
|                                 | During Covid | $x < 2$ times a week        | 0.338        | 0.044          | 7.710         | 0.000        | 0.252                     | 0.424        |
|                                 |              | $2 \leq x < 4$ times a week | <b>0.259</b> | <b>0.047</b>   | <b>5.540</b>  | <b>0.000</b> | <b>0.168</b>              | <b>0.351</b> |
|                                 |              | $x \geq 4$ times a week     | 1.000        | 0.000          | 2427.920      | 0.000        | 0.999                     | 1.001        |
|                                 | Late Covid   | $x < 2$ times a week        | <b>0.155</b> | <b>0.073</b>   | <b>2.130</b>  | <b>0.033</b> | <b>0.012</b>              | <b>0.298</b> |
|                                 |              | $2 \leq x < 4$ times a week | 0.118        | 0.103          | 1.150         | 0.251        | -0.083                    | 0.319        |
|                                 |              | $x \geq 4$ times a week     | 0.213        | 0.038          | 5.560         | 0.000        | 0.138                     | 0.288        |

Table S8: Predicted margins (probability), P-value, and 95% confidence interval of moderate and severe mental distress levels by exercise frequency and Covid-19 era on women during weekends. **high exercise frequency before COVID-19, and moderate exercise frequency during and late COVID-19 are associated with the lowest probability to be in the moderate mental distress level, and high exercise frequency before COVID-19, moderate exercise frequency during COVID-19, and low exercise frequency late COVID-19 are associated with the lowest probability to be in the severe mental distress level. Moderate exercise frequency before COVID-19, low exercise frequency during COVID-19, and high exercise frequency late COVID-19 are associated with the highest probability to be in the moderate mental distress level, and moderate exercise frequency before COVID-19, and high exercise frequency during and late COVID-19 are associated with the highest probability to be in the severe mental distress level.**



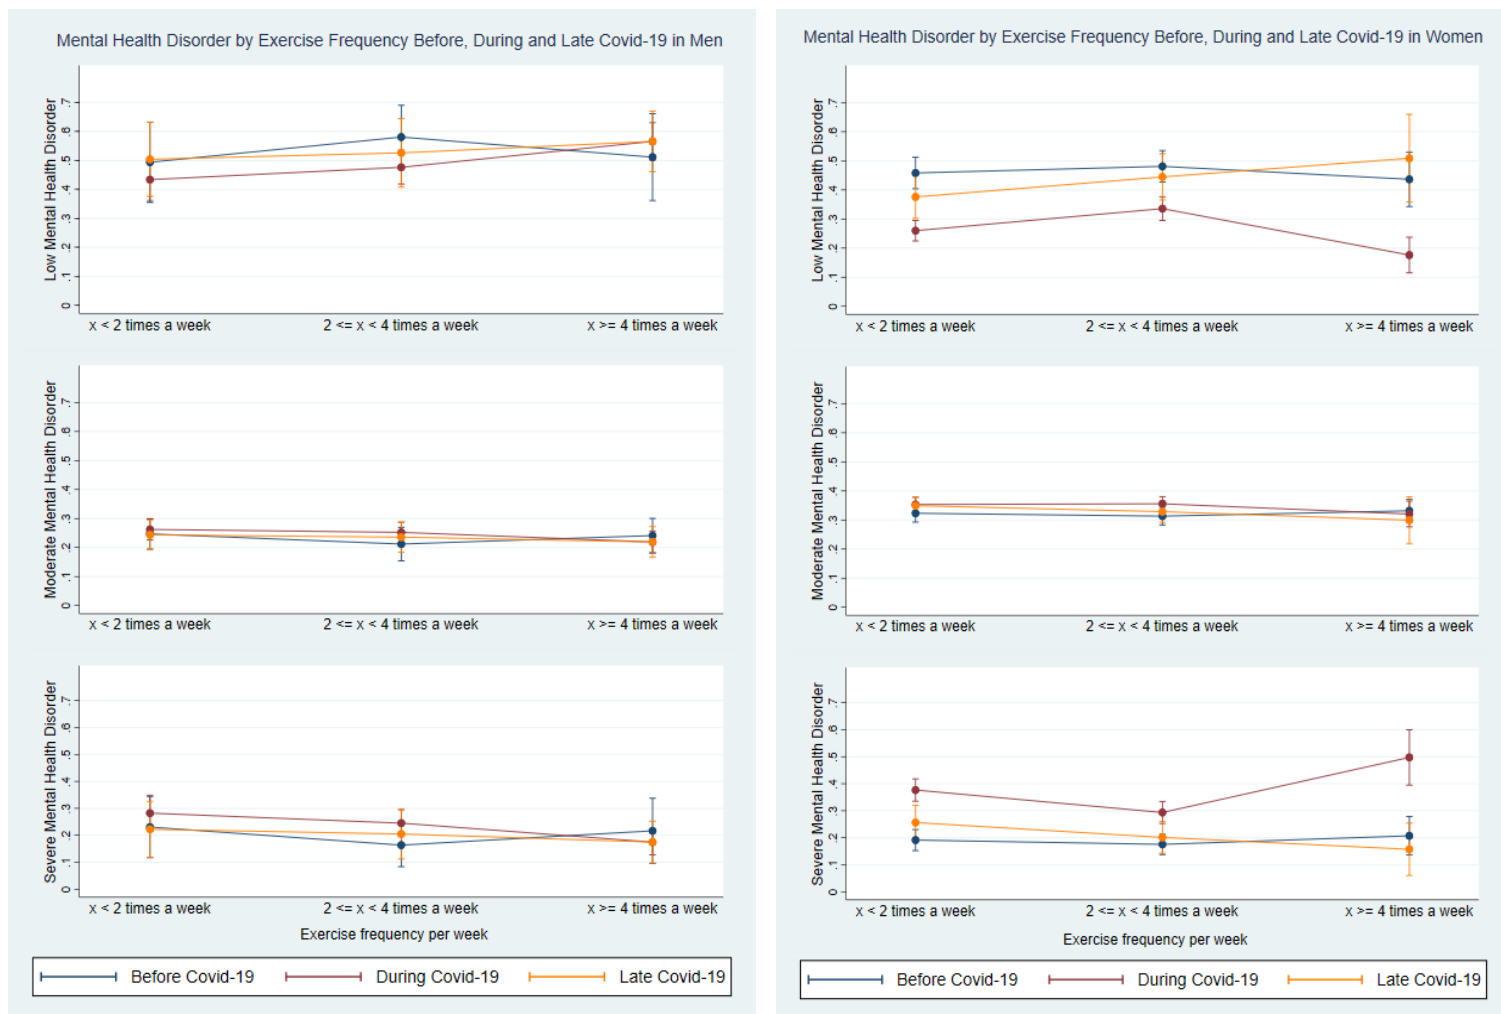

Figure S1: Left: Predicted margins (probability) of each mental distress level by exercise frequency and COVID-19 duration in men - Right: Predicted margins (probability) of each mental distress level by exercise frequency and COVID-19 duration in women

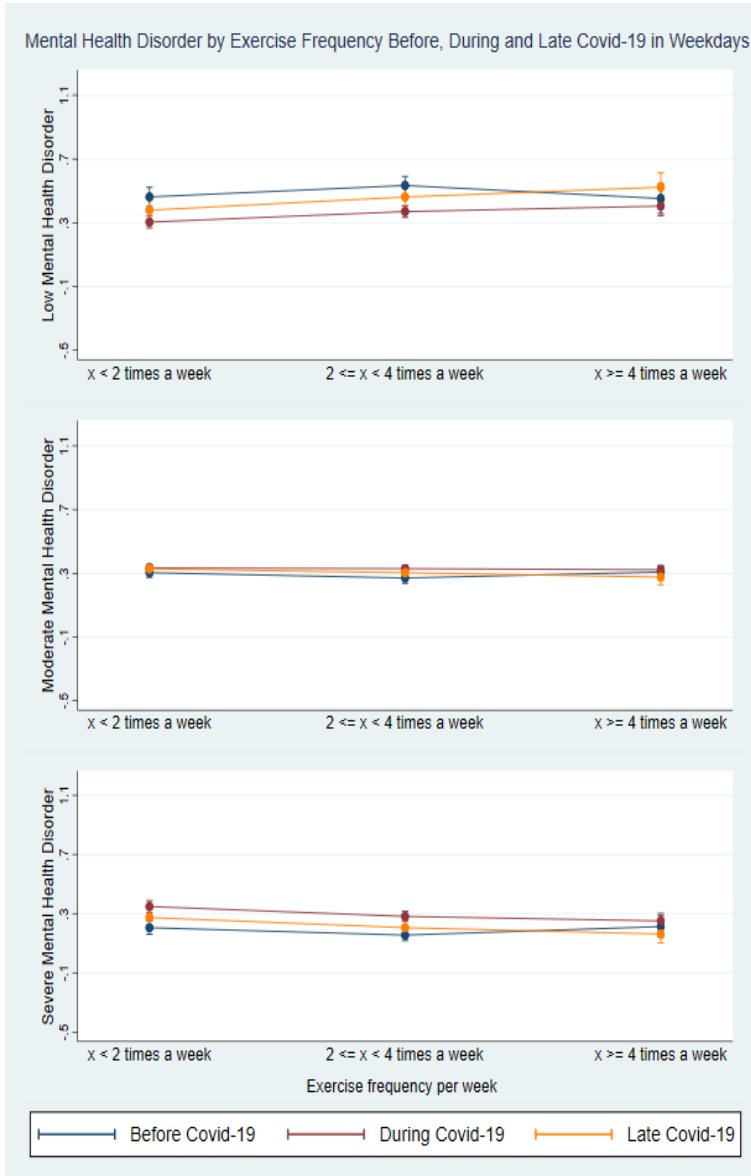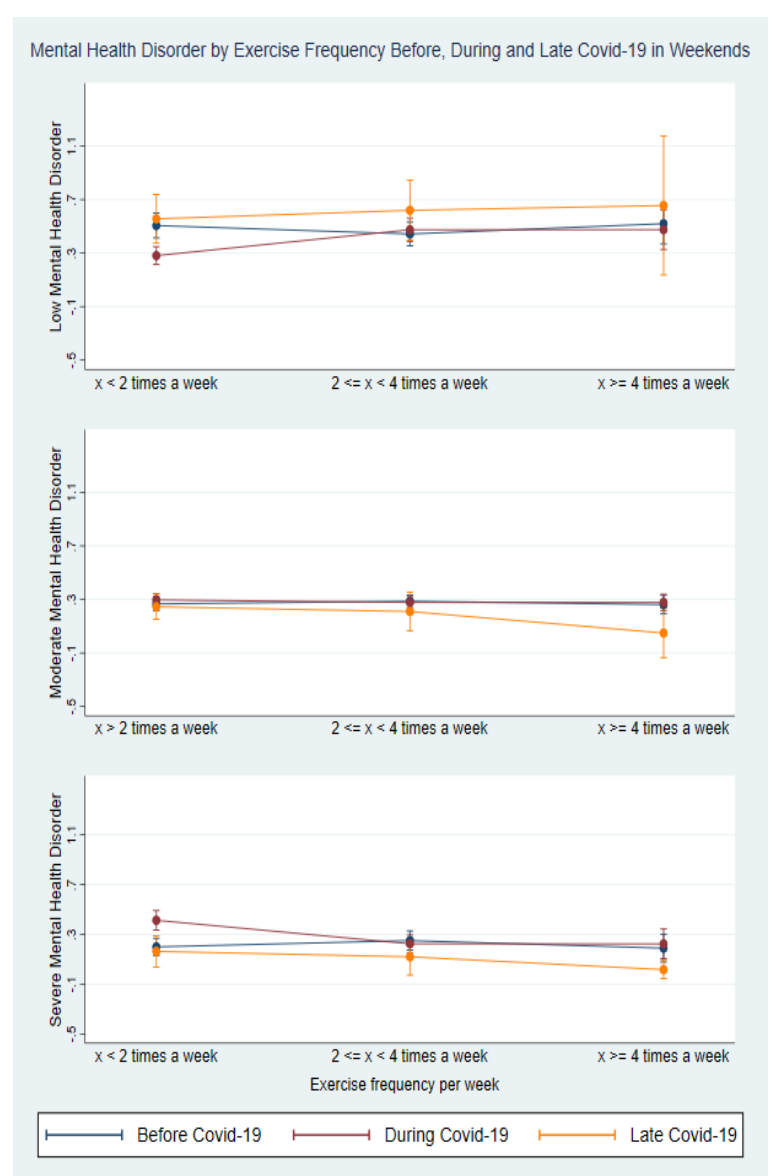

Figure S2: Left: Predicted margins (probability) of each mental distress level by exercise frequency and COVID-19 duration during weekdays - Right: Predicted margins (probability) of each mental distress level by exercise frequency and COVID-19 duration during weekends

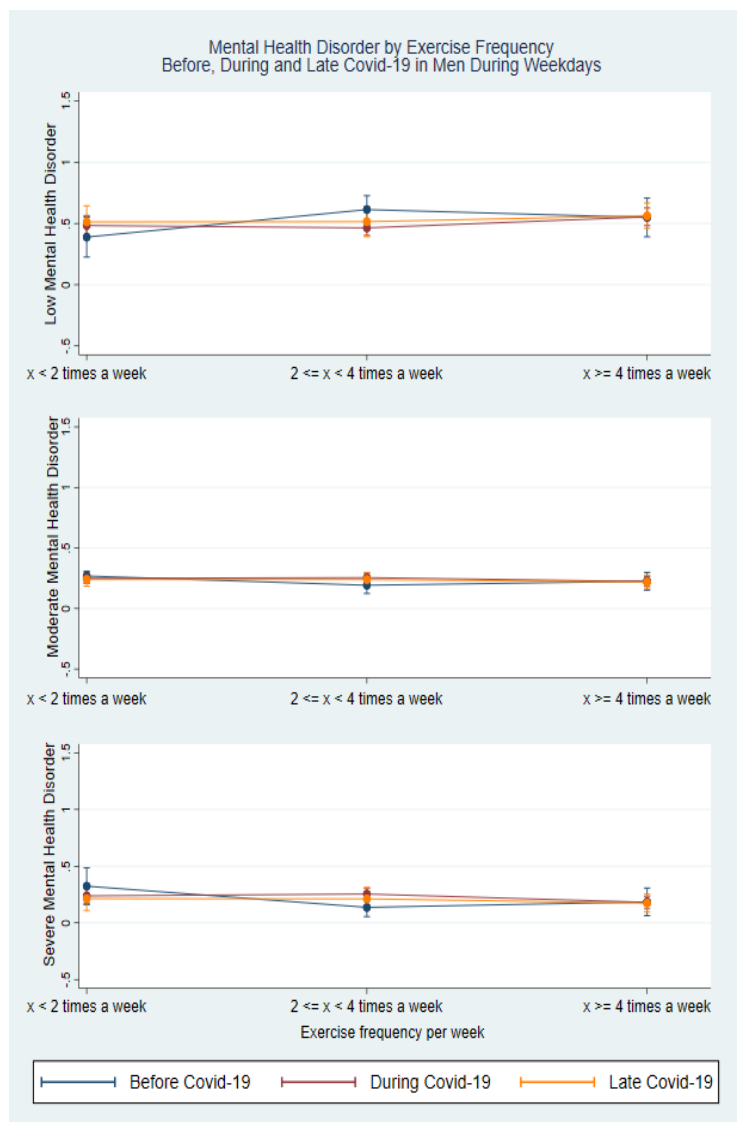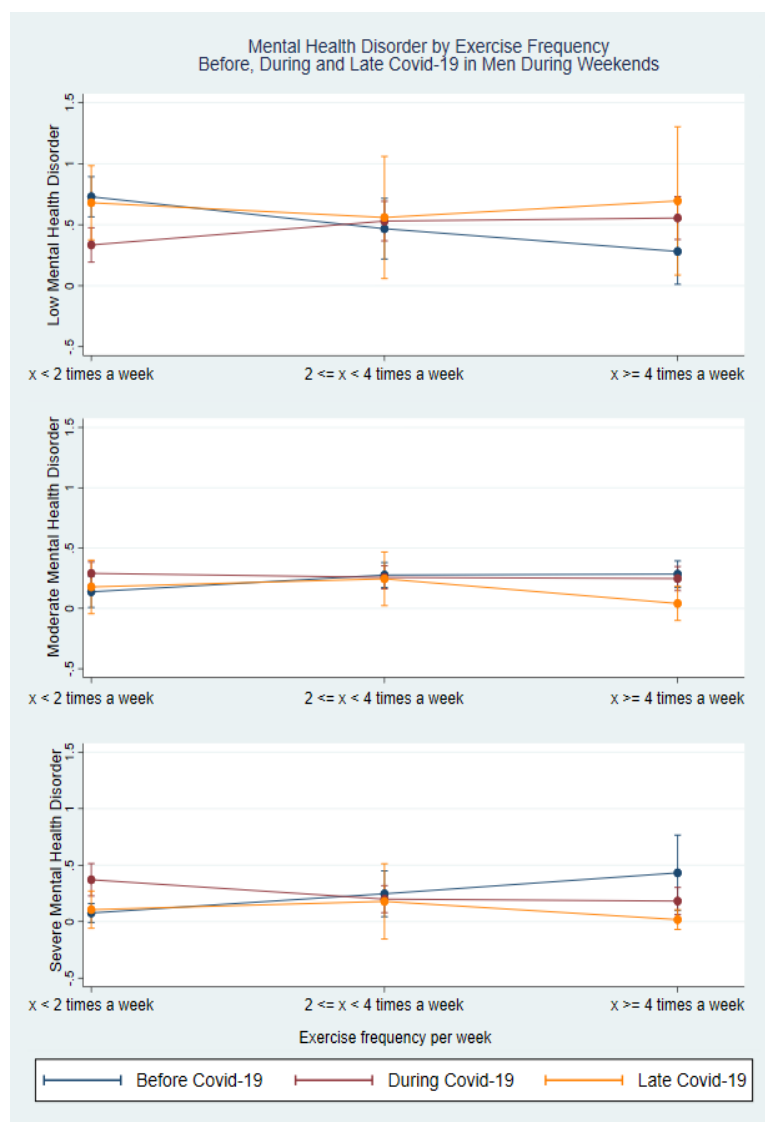

Figure S3: Left: Predicted margins (probability) of each mental distress level by exercise frequency and COVID-19 duration in men during weekdays - Right: Predicted margins (probability) of each mental distress level by exercise frequency and COVID-19 duration in men during weekends

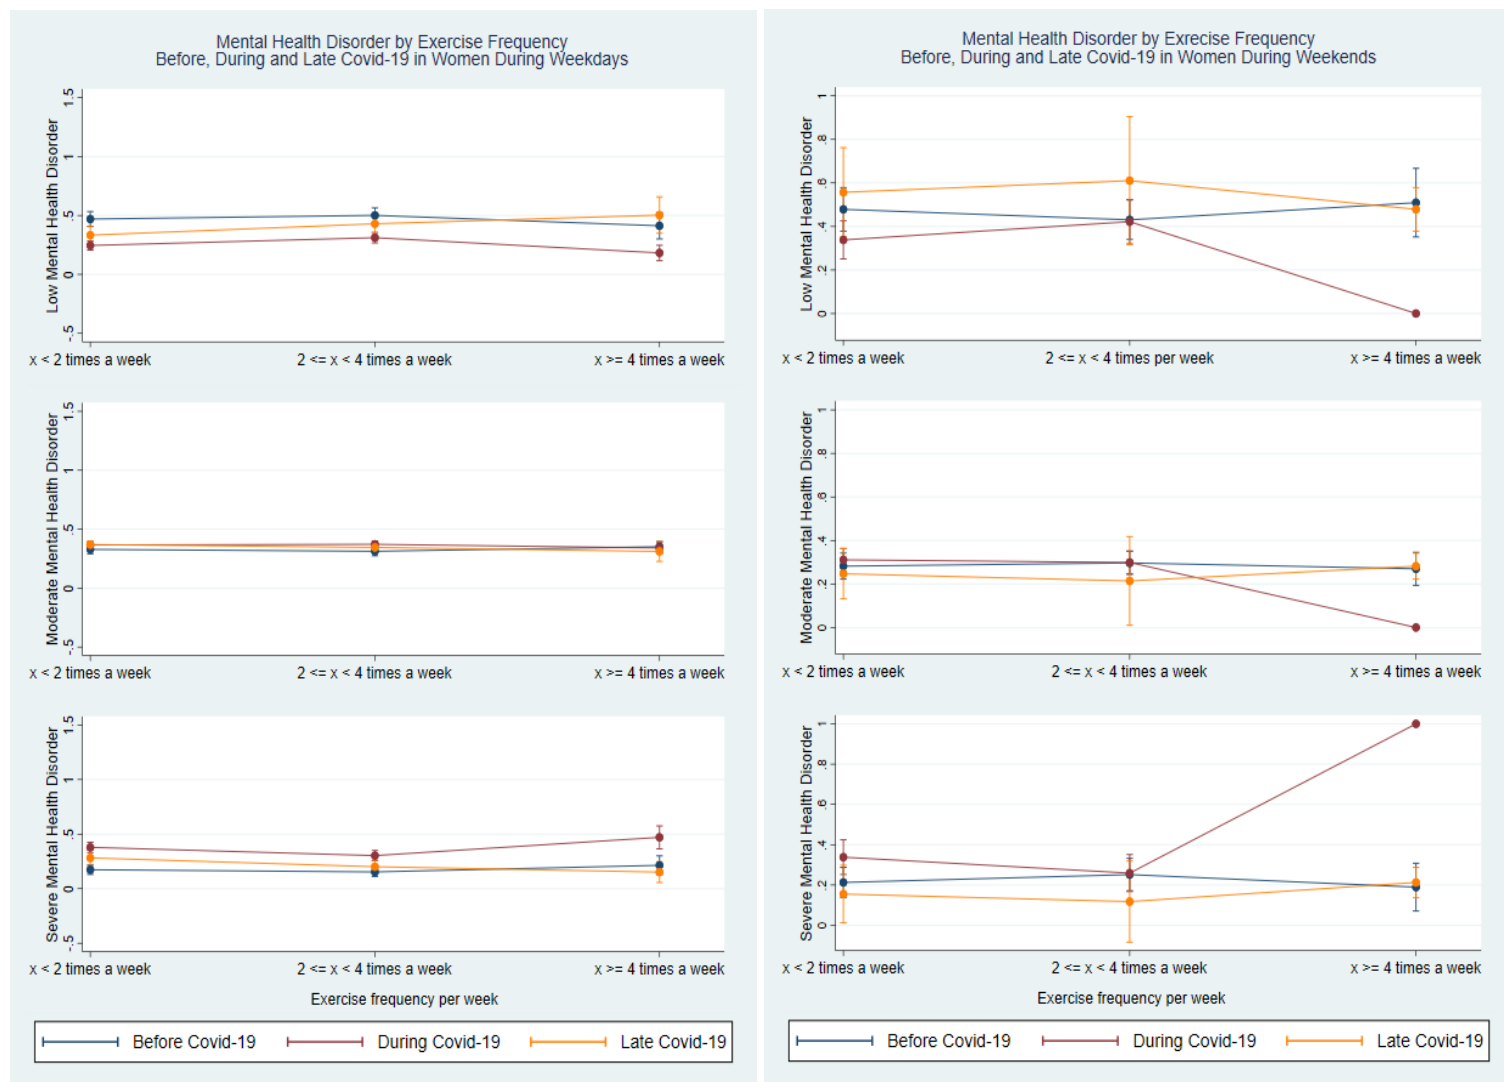

Figure S4: Left: Predicted margins (probability) of each mental distress level by exercise frequency and COVID-19 duration in women during weekdays - Right: Predicted margins (probability) of each mental distress level by exercise frequency and COVID-19 duration in women during weekends
